# Supplementary material for: Exogenous Ceramide Serves as a Precursor to Endogenous Ceramide Synthesis and as a Modulator of Keratinocyte Differentiation
Source: MDPI journal article supplement (doi:10.3390/cells11111742), 2022-05-25
Supplement: s1 [file s1]

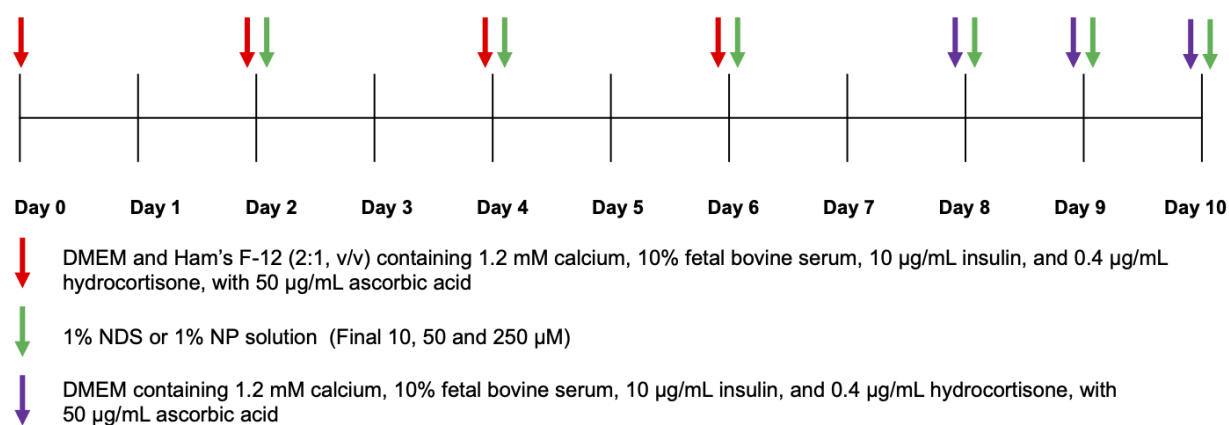

### K10 Keratin, Involucrin and Loricrin Protein Expression

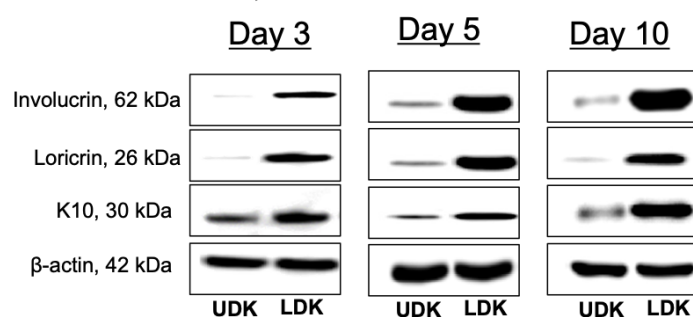

**Figure S1:** Culture Scheme.

KCs cultured with serum-free cultured medium containing 0.07 mM  $\text{Ca}^{2+}$  at 60-70% confluence were further cultured in differentiation-inducing medium as indicated scheme. Western blot analysis demonstrated that increases in K10 keratin (early KC differentiation marker), involucrin (middle KC differentiation marker) and loricrin (late KC differentiation marker) production during cultures.

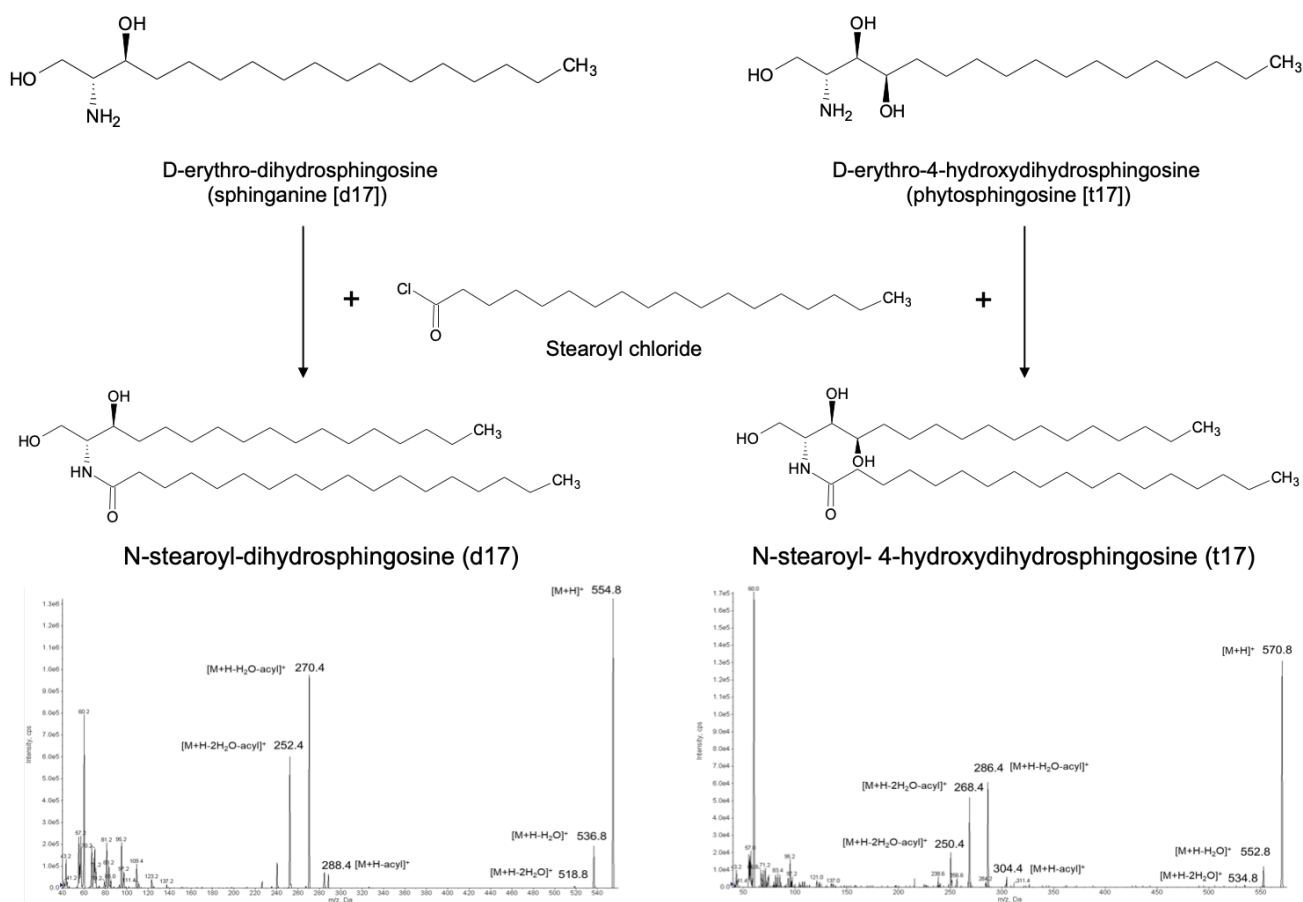

**Figure S2:** Outline of C17NDS and C17 NP preparation and verification by LC-MS/MS.

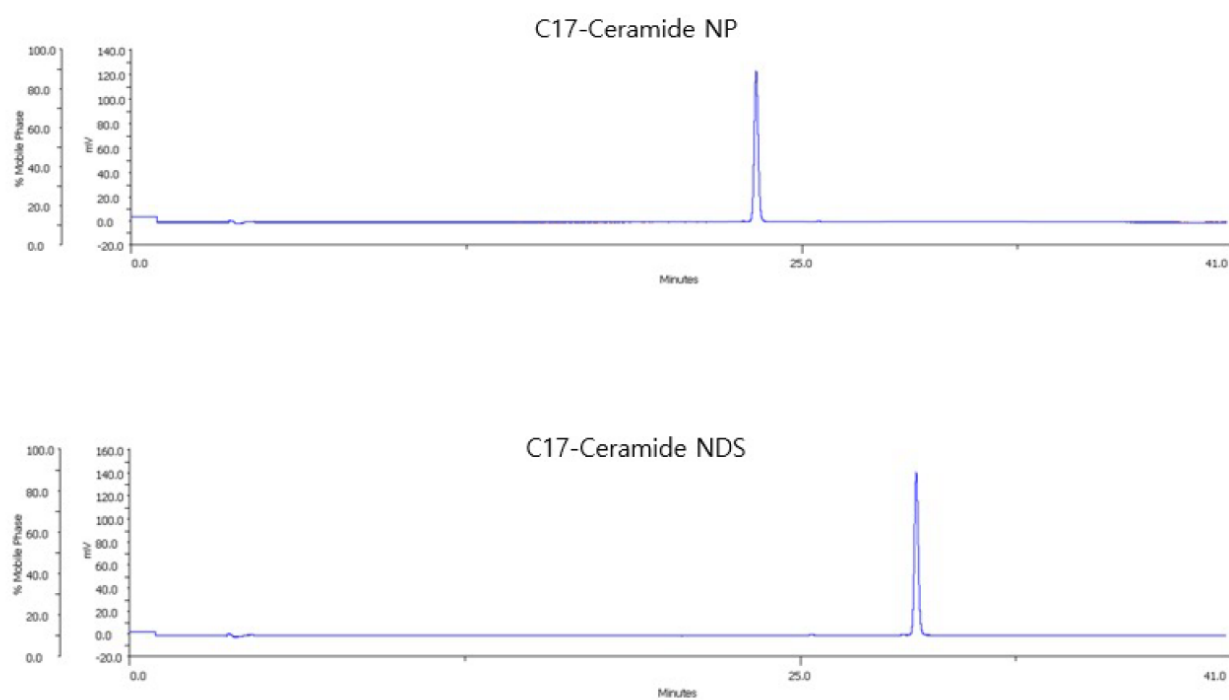

**Figure S3:** HPLC chromatograms synthesized C17NDS.

|            | Precursor of diverse Cer | Differentiation | Diverse Cer via differentiation | Cathelicidin |
|------------|--------------------------|-----------------|---------------------------------|--------------|
| <b>NDS</b> | ○                        | ◎               | ○                               | ○            |
| <b>NP</b>  | X                        | ○               | ○                               | X            |

  

|            | Invoruclin | Loricrin |
|------------|------------|----------|
| <b>NDS</b> | ◎          | ◎        |
| <b>NP</b>  | ○          | ○        |

**Figure S4:** Biological features of exogenous NDS and NP in KC.
